# Supplementary material for: The SDGs and human well-being: a global analysis of synergies, trade-offs, and regional differences
Source: PubMed Central journal article supplement (PMC7492223; doi:10.1038/s41598-020-71916-9), 2020-09-15

## Supplementary Information for

# The SDGs and human well-being: a global analysis of synergies, trade-offs, and regional differences

Jan-Emmanuel De Neve<sup>\*1,2</sup> and Jeffrey D. Sachs<sup>3,4</sup>

<sup>1</sup>Wellbeing Research Centre, University of Oxford

<sup>2</sup>Saïd Business School, University of Oxford

<sup>3</sup>Centre for Sustainable Development, Columbia University

<sup>4</sup>Sustainable Development Solutions Network

\*Correspondence to [jan-emmanuel.deneve@sbs.ox.ac.uk](mailto:jan-emmanuel.deneve@sbs.ox.ac.uk)

**Supplementary Table S1: Model curvature test for SDG Index on SWB**

|                                | SWB                  | SWB                 |
|--------------------------------|----------------------|---------------------|
| <b>SDG Index</b>               | 0.7865***<br>(15.44) | -0.8926<br>(-1.53)  |
| <b>(SDG Index)<sup>2</sup></b> | -                    | 1.6852***<br>(2.90) |
| <b>Adjusted R<sup>2</sup></b>  | 0.616                | 0.634               |
| <b>N</b>                       | 149                  | 149                 |

Note: \*\*\* means significant at the 1% level and t-statistics are given in parentheses

**Supplementary Table S2: Model fit by power**

| Model fit by power          | Akaike information criterion (AIC) score | Bayesian information criterion (BIC) score |
|-----------------------------|------------------------------------------|--------------------------------------------|
| <b>Linear</b>               | 313.4523                                 | 319.4602                                   |
| <b>quadratic</b>            | 307.1310                                 | 316.1428                                   |
| <b>3<sup>d</sup> power</b>  | 309.1064                                 | 321.1221                                   |
| <b>4<sup>th</sup> power</b> | 311.0866                                 | 326.1063                                   |

**Supplementary Table S3: Country outliers relative to model line of best fit**

| Country      | Distance above fit line | Country  | Distance below fit line |
|--------------|-------------------------|----------|-------------------------|
| Guatemala    | 1.73                    | Ukraine  | 1.61                    |
| Israel       | 1.36                    | Botswana | 1.24                    |
| Nigeria      | 1.28                    | Tanzania | 1.23                    |
| Saudi Arabia | 1.25                    | Tunisia  | 1.18                    |
| UAE          | 1.24                    | Belarus  | 1.16                    |
| Pakistan     | 1.22                    | Syria    | 1.16                    |
| Australia    | 1.19                    | Iran     | 1.15                    |
| Mexico       | 1.12                    | Rwanda   | 1.14                    |
| Qatar        | 1.11                    | Bulgaria | 1.12                    |
| Panama       | 1.06                    | Egypt    | 1.10                    |

**Supplementary Table S4: Top 10 countries closest to the top right for Figure 2 (by Euclidean distance).**

| Country     | Euclidean Distance from (10,100)* |
|-------------|-----------------------------------|
| Costa Rica  | 33                                |
| Guatemala   | 38                                |
| Uzbekistan  | 39                                |
| El Salvador | 40                                |
| Mexico      | 40                                |
| Nicaragua   | 40                                |
| Colombia    | 42                                |
| Panama      | 42                                |
| Jamaica     | 42                                |
| Ecuador     | 43                                |

Note: The well-being scores are multiplied by 10 so they are on same scale as the SDGs

**Supplementary Table S5: Top 10 countries closest to the top right for Figure 3 (by Euclidean distance).**

| Country     | Euclidean Distance from (10,100)* |
|-------------|-----------------------------------|
| Denmark     | 26                                |
| Switzerland | 28                                |
| Iceland     | 28                                |
| Netherlands | 28                                |
| New Zealand | 28                                |
| Costa Rica  | 29                                |
| Sweden      | 29                                |
| Israel      | 30                                |
| Ireland     | 31                                |
| Germany     | 32                                |

Note: The well-being scores are multiplied by 10 so they are on same scale as the SDGs

**Supplementary Figure S1: Sustainable development and positive affect**

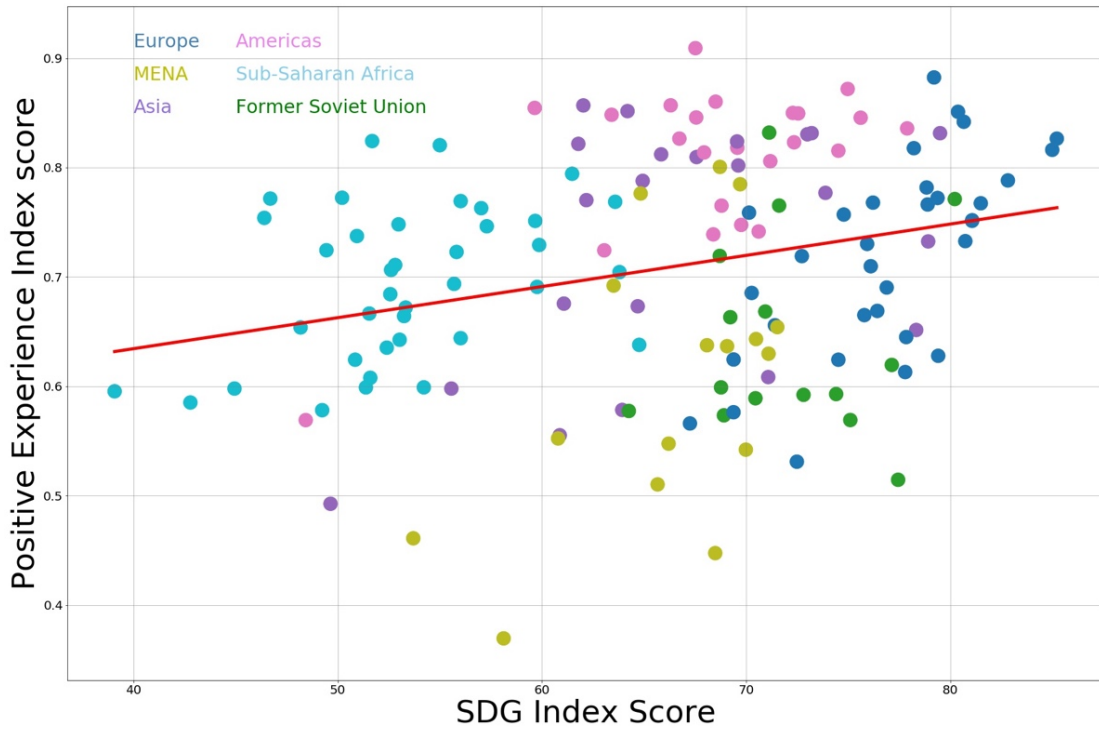

**Supplementary Figure S2: Sustainable development and negative affect**

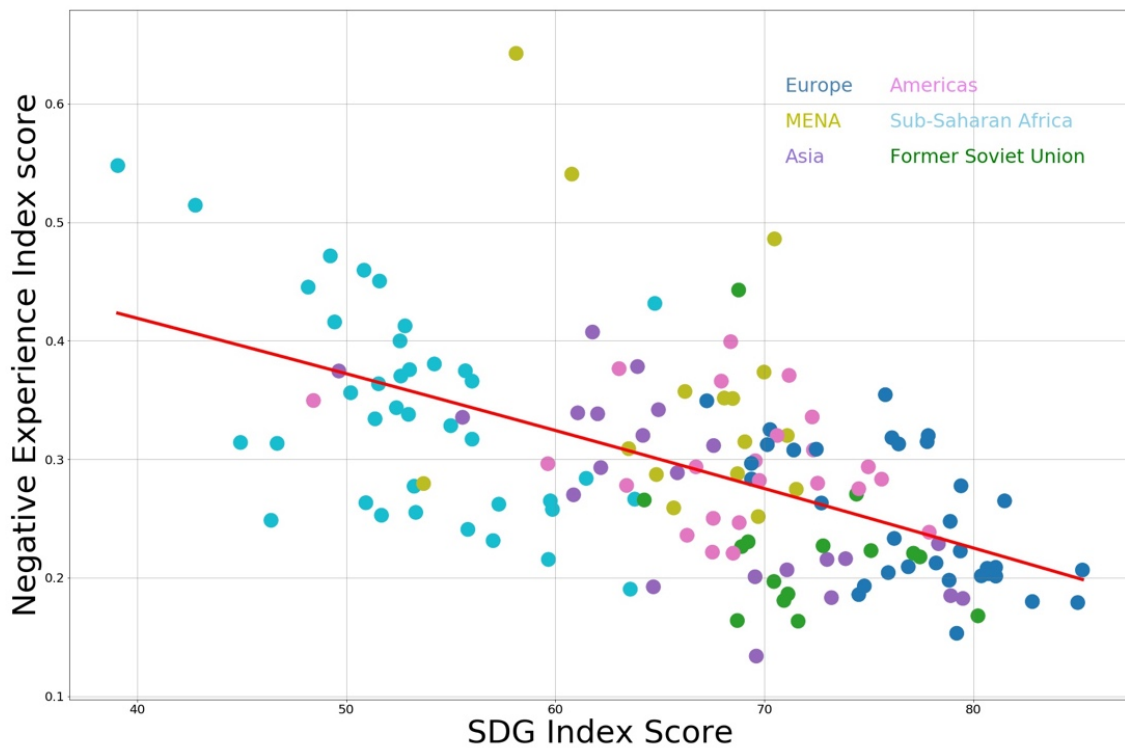

Supplement: 41598_2020_71916_MOESM1_ESM.pdf [file 41598_2020_71916_MOESM1_ESM.pdf]
